# Supplementary material
Source: MDPI journal article supplement (https://www.mdpi.com/1424-2818/11/12/225)
Supplement: s1 [file s1]

Archive with 2 entries (2 files):
- Supplement/Esemu-2019-R2_TC_flat.docx
- Supplement/Main supplemental file-R1.pdf
